# Supplementary material for: Factors Associated With Persistent Opioid Use Among Injured Workers’ Compensation Claimants
Source: PubMed Central journal article supplement (PMC6324441; doi:10.1001/jamanetworkopen.2018.4050), 2018-10-26
Supplement: jamanetwopen-1-e184050-s001.pdf [file jamanetwopen-1-e184050-s001.pdf]

## Supplementary Online Content

O'Hara NN, Pollak AN, Welsh CJ, et al. Factors associated with persistent opioid use among injured workers' compensation claimants. *JAMA Netw Open*. 2018;1(6):e184050. doi:10.1001/jamanetworkopen.2018.4050

**eTable.** ICD-9 Codes Used to Determine Chronic Pain Diagnosis  
**eReference**

This supplementary material has been provided by the authors to give readers additional information about their work.

**eTable. ICD-9 Codes Used to Determine Chronic Pain Diagnosis**

| <b>Pain Disorder Category</b>                    | <b>ICD9 Code</b>                                                                                                                                                                                                                                                                                                                                                                                              |
|--------------------------------------------------|---------------------------------------------------------------------------------------------------------------------------------------------------------------------------------------------------------------------------------------------------------------------------------------------------------------------------------------------------------------------------------------------------------------|
| Back                                             | 722.30, 722.32, 722.33, 722.70, 722.72, 722.73, 722.80, 722.82, 722.83, 722.90, 722.92, 722.93, 737.1, 737.3, 738.4, 738.5, 739.2, 739.3, 739.4, 756.10, 756.11, 756.12, 756.19, 805.4, 805.8, 839.2, 839.42, 846, 846.0, 847.1, 847.2, 847.3, 847.9, 721.3x - 721.9x, 722.2x, 724.xx, 756.13                                                                                                                 |
| Neck                                             | 721.0X, 721.1X, 722.0X, 722.31, 722.71, 722.81, 722.91, 723.XX, 839.0, 839.1, 847.0                                                                                                                                                                                                                                                                                                                           |
| Arthritis and joint pain                         | 711.XX, 712.XX, 713.X, 714.XX, 715.XX, 716.XX, 717.XX, 718.XX, 719.XX, 725, 726.XX, 727.XX, 728.XX, 729.3X, 729.7X, 729.8X, 729.9X, 730.XX, 731.X, 732.X, 733.XX, 734, 735.X, 736.XX, 737.2X, 737.4X, 738.1X, 710, 710.1, 710.3, 710.4, 710.5, 710.8, 710.9, 729, 729.2, 729.4, 729.5, 729.6, 737, 737.8, 737.9, 738, 738.2, 738.3, 738.6, 738.7, 738.8, 738.9, 739, 739.1, 739.5, 739.6, 739.7, 739.8, 739.9 |
| <b>Other Pain Disorders</b>                      |                                                                                                                                                                                                                                                                                                                                                                                                               |
| TMJD                                             | 524.60, 524.61, 524.62, 524.63, 524.64, 524.69                                                                                                                                                                                                                                                                                                                                                                |
| Tension headache                                 | 307.81                                                                                                                                                                                                                                                                                                                                                                                                        |
| Headache/head pain/suboccipital headache         | 784.0                                                                                                                                                                                                                                                                                                                                                                                                         |
| Occipital neuralgia/headache                     | 723.8                                                                                                                                                                                                                                                                                                                                                                                                         |
| Tear film insufficiency, unspecified (dry eyes)  | 375.15                                                                                                                                                                                                                                                                                                                                                                                                        |
| Myalgia and myositis, unspecified (Fibromyalgia) | 729.1                                                                                                                                                                                                                                                                                                                                                                                                         |
| Noncardiac or musculoskeletal chest pain         | 786.59                                                                                                                                                                                                                                                                                                                                                                                                        |
| Dyskinesia of the esophagus                      | 530.5                                                                                                                                                                                                                                                                                                                                                                                                         |
| Functional bowel (includes IBS)                  | 564.xx                                                                                                                                                                                                                                                                                                                                                                                                        |
| Interstitial cystitis                            | 595.1                                                                                                                                                                                                                                                                                                                                                                                                         |
| Vulvodynia                                       | 625.7x                                                                                                                                                                                                                                                                                                                                                                                                        |
| Endometriosis                                    | 617.x                                                                                                                                                                                                                                                                                                                                                                                                         |
| Dyspepsia                                        | 536.8                                                                                                                                                                                                                                                                                                                                                                                                         |
| Sicca syndrome                                   | 710.2                                                                                                                                                                                                                                                                                                                                                                                                         |
| Tinnitus                                         | 388.3                                                                                                                                                                                                                                                                                                                                                                                                         |
| Chronic fatigue syndrome                         | 780.71                                                                                                                                                                                                                                                                                                                                                                                                        |
| Migraine                                         | 346.00, 346.01, 346.02, 346.03, 346.10, 346.11, 346.12, 346.13, 346.20, 346.21, 346.22, 346.23, 346.30, 346.31, 346.32, 346.33, 346.40, 346.41, 346.42, 346.43, 346.50, 346.51, 346.52, 346.53, 346.60, 346.61, 346.62, 346.63, 346.70, 346.71, 346.72, 346.73, 346.80, 346.81, 346.82, 346.83, 346.90, 346.91, 346.92, 346.93                                                                                |
| Insomnia                                         | 780.52                                                                                                                                                                                                                                                                                                                                                                                                        |

## **eReference**

1. Adapted from: Brummett CM, Waljee JF, Goesling J, et al. New persistent opioid use after minor and major surgical procedures in US adults. *JAMA Surg.* 2017 Jun 21;152(6):e170504.
